# Supplementary material for: Proteomic Characterization of PAMs with PRRSV-ADE Infection
Source: MDPI journal article supplement (doi:10.3390/v15010036), 2022-12-22
Supplement: s1 [file s1]

Table S1. The primers used in this study

| Primer Name          | Primer Sequence (5' -3' )        |
|----------------------|----------------------------------|
| Actin                | Forward: CGGGACATCAAGGAGAAGC     |
|                      | Reverse: CTCGTTGCCGATGGTGATG     |
| COX-5B               | Forward: GGGACTGGACCCATACAATATAC |
|                      | Reverse: CACAGATGCAGCCCACTAT     |
| ISG56 <sup>[9]</sup> | Forward: TCAGAGGTGAGAAGGCTGGT    |
|                      | Reverse: GCTTCCTGCAAGTGTCTTC     |
| MMP-9                | Forward: CGACATCTTCCAGTACCAAGAG  |
|                      | Reverse: CCCACATAGTCCACCTGATTC   |
| Mx1                  | Forward: TACGACATCGAATACCAGATCAA |
|                      | Reverse: ATGGTCCTGTCTCCTTCGG     |
| OAS1                 | Forward: CATCAGAAGCTTTGCATCT     |
|                      | Reverse: GGCCTGGGTTTCTTGAGTT     |
| RSAD2                | Forward: GCGCTTCCTGAACTGTAGAA    |
|                      | Reverse: TCCTCCTCGCTTTAGAAACATC  |
